# Supplementary material
Source: PubMed Central journal article supplement (PMC2788889)
Supplement: supp_M109.037762_jbc.M109.037762-1.pdf [file supp_M109.037762_jbc.M109.037762-1.pdf]

**AN ASYMMETRIC MODEL FOR  $\text{Na}^+$ -TRANSLOCATING GLUTACONYL-COA  
DECARBOXYLASES**

**Daniel Kреб, Daniela Brügel, Iris Schall, Dietmar Linder, Wolfgang Buckel  
and Lars-Oliver Essen**

**SUPPLEMENTAL FIGURES**

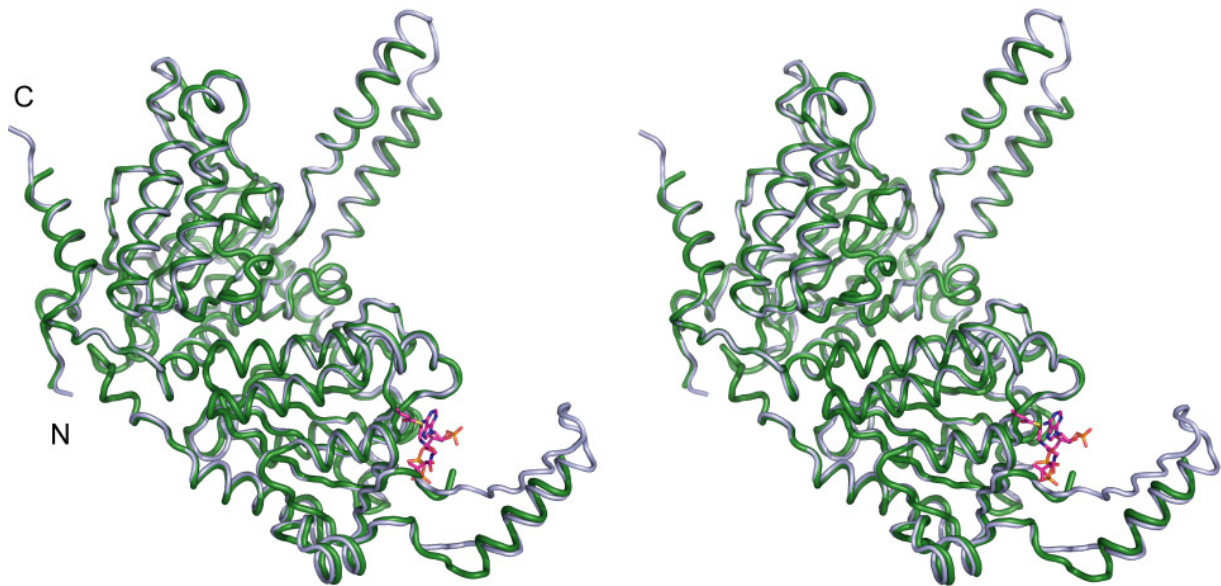

**Figure S1:** Stereo representation of a superposition of the *C. symbiosum* (dark green) and *A. fermentans* (light blue) GcdA monomer structures. The coloring of the displayed stick model of crotonyl-CoA is in accordance to Fig. 4A.

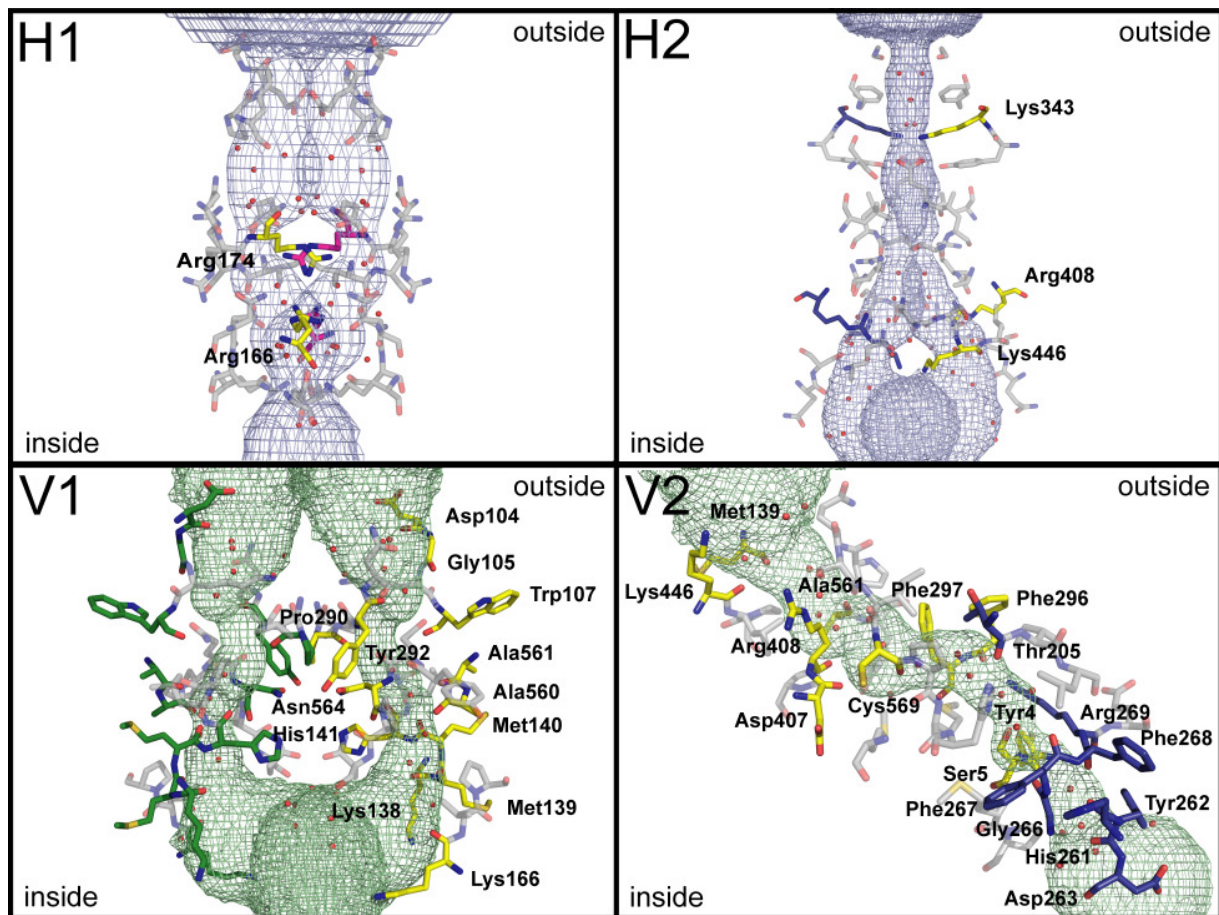

Figure S2: Close-up view of the four different horizontal (H) and vertical (V) channels found in the GcdA tetramer. Residues at a distance of 5 Å from the centers of the tunnels are shown as gray stick models. The bottle neck residues for the horizontal tunnels and residues supposed to permit transient coordination of monovalent cations in case of the vertical channels are displayed in the colors of their respective protein chains (cf. Fig. 6). In case of H1, V1 and V2 only one portion of residues was labeled for clarity reasons. Water molecules are illustrated as red spheres. For this analysis an initial tunnel search using the Molaxis server (2) was further refined using the programs Mole (3) and CAVER (4). The figure was created using the CAVER Plugin for the program Pymol.

## SUPPLEMENTAL FIGURES

**Table S1.** Data collection statistics for *C. symbiosum* GcdA and its complexes. Values in parentheses correspond to the highest resolution shell.

|                                                       | Apo <sup>1</sup> | Crotonyl-CoA <sup>1</sup> | Glutaryl-CoA <sup>2</sup> | Glutaconyl-CoA <sup>2</sup> |
|-------------------------------------------------------|------------------|---------------------------|---------------------------|-----------------------------|
| <b>Wavelength (Å)</b>                                 | 0.80150          | 0.80150                   | 1.54179                   | 1.54179                     |
| <b>Resolution (Å)</b>                                 | 2.40             | 2.50                      | 2.70                      | 1.75                        |
| <b>Highest resolution shell</b>                       | 2.53 - 2.40      | 2.64 – 2.50               | 2.85 - 2.59               | 1.84 – 1.75                 |
| <b>Total reflections</b>                              | 148483           | 212893                    | 402828                    | 239351                      |
| <b>Unique reflections (&gt; 1<math>\sigma</math>)</b> | 24154            | 79234                     | 61822                     | 60672                       |
| <b>Completeness (%)</b>                               | 99.9 (100.0)     | 99.6 (98.9)               | 98.7 (91.4)               | 97.9 (99.7)                 |
| <b>I/<math>\sigma</math></b>                          | 20.9 (5.1)       | 9.6 (2.1)                 | 16.6 (3.4)                | 18.9 (4.5)                  |
| <b>R<sub>merge</sub></b>                              | 0.074 (0.334)    | 0.097 (0.464)             | 0.103 (0.455)             | 0.046 (0.262)               |
| <b>Multiplicity</b>                                   | 6.1 (6.2)        | 2.7 (2.4)                 | 6.5 (6.1)                 | 3.9 (3.7)                   |
| <b>Space group</b>                                    | F222             | C2                        | P3 <sub>1</sub> 21        | F222                        |
| <b>Unit cell parameters</b>                           |                  |                           |                           |                             |
| <b>a (Å)</b>                                          | 102.05           | 101.50                    | 156.47                    | 102.360                     |
| <b>b (Å)</b>                                          | 143.53           | 167.45                    | 156.47                    | 144.360                     |
| <b>c (Å)</b>                                          | 167.52           | 138.11                    | 141.40                    | 167.150                     |
| <b><math>\alpha</math> (°)</b>                        | 90.00            | 90.00                     | 90.00                     | 90.00                       |
| <b><math>\beta</math> (°)</b>                         | 90.00            | 89.98                     | 90.00                     | 90.00                       |
| <b><math>\gamma</math> (°)</b>                        | 90.00            | 90.00                     | 120.00                    | 90.00                       |
| <b>Monomers per asymmetric unit</b>                   | 1                | 4                         | 2                         | 1                           |

<sup>1</sup> collected at X13 beamline at DESY, EMBL-Hamburg

<sup>2</sup> collected with rotating anode

**Table S2.** Refinement statistics for *C. symbiosum* GcdA and its complexes.

|                                           | Apo                    | Crotonyl-CoA                   | Glutaryl-CoA                   | Glutaconyl-CoA         |
|-------------------------------------------|------------------------|--------------------------------|--------------------------------|------------------------|
| <b>R<sub>cryst</sub>/R<sub>free</sub></b> | 0.185 / 0.225          | 0.194 / 0.230                  | 0.189 / 0.210                  | 0.163 / 0.176          |
| <b>r.m.s.d. bond length (Å)</b>           | 0.007                  | 0.009                          | 0.008                          | 0.008                  |
| <b>r.m.s.d. bond angles (°)</b>           | 1.095                  | 1.202                          | 1.155                          | 1.173                  |
| <b>Average B factor (Å<sup>2</sup>)</b>   | 31.6                   | 35.7                           | 36.9                           | 23.2                   |
| <b>number of protein atoms</b>            | 4202                   | 17298                          | 8723                           | 4371                   |
| <b>number ligand atoms</b>                | -                      | 212                            | 112                            | 53                     |
| <b>number of ion atoms</b>                | 5                      | 4                              | -                              | 1                      |
| <b>number of water molecules</b>          | 201                    | 627                            | 352                            | 466                    |
| <b>Ramachandran Plot (%)</b>              |                        |                                |                                |                        |
| <b>Most favored</b>                       | 90.1                   | 89.6                           | 90.6                           | 91.3                   |
| <b>Allowed</b>                            | 9.3                    | 9.3                            | 8.6                            | 7.8                    |
| <b>Generously allowed</b>                 | 0.2                    | 0.6                            | 0.4                            | 0.4                    |
| <b>Disallowed</b>                         | 0.4                    | 0.4                            | 0.4                            | 0.4                    |
| <b>Gaps<sup>1</sup></b>                   | G218-K251<br>L502-Q513 | G221-A237 (C)<br>K501-Q513 (C) | A220-A236 (A)<br>K501-Q513 (A) | G221-A237<br>A505-Q513 |

<sup>1</sup> In case of the structural models containing more than one chain in the asymmetric unit only the widest gaps are displayed with the respective chain identifier in parenthesis.

### SUPPLEMENTAL REFERENCES

1. DeLano, W. L. (2002) *The PyMOL molecular graphics system*. DeLano Scientific LLC, <http://www.pymol.org>, San Carlos, CA, USA
2. Yaffe, E., Fishelovitch, D., Wolfson, H. J., Halperin, D., and Nussinov, R. (2008) *Nucleic Acids Res.* **36**, W210-215
3. Petrek, M., Kosinova, P., Koca, J., and Otyepka, M. (2007) *Structure* **15**, 1357-1363
4. Petrek, M., Otyepka, M., Banas, P., Kosinova, P., Koca, J., and Damborsky, J. (2006) *BMC Bioinformatics* **7**, 316
